# Supplementary material for: Two classes of amine/glutamate multi-transmitter neurons innervate Drosophila internal male reproductive organs
Source: eLife. 2026 Jan 9;14:RP108225. doi: 10.7554/eLife.108225 (PMC12788803; doi:10.7554/eLife.108225)
Supplement: Figure 10—figure supplement 2—source data 1. [file elife-108225-fig10-figsupp2-data1.xlsx]

## Sheet: Fertility Assay 5 day
TRH ∩ VT019028 → vGlut -	TRH	VT019028	TRH ∩ VT019028	AbdB ∩ TRH
91	162	157	95	200
192	174	167	144	168
182	134	102	148	177
183	155	168	141	168
136	183	158	134	195
187	154	159	134	120
193	149	154	129	177
173	160	126	153	184
179	170	140	122	184
192	189	142	118	184
210	180	124	115	177
189	177	163	126	193
176	165	154	140	175
164	180	132	140	175
169	171	160	131	172
198	210	155	119	186
185	175	99	155	192
145	159	145	161	201
180	215	176	217	111
183	181	165	186	167
188	143	152	200
199	203	161	179
140	143	119	158
186	199	166	175
153	178	170	172
142	183		165
177	146		149
196	201		145
138			163
170			156
191			126
185			171
151
166
