# Supplementary material for: Two classes of amine/glutamate multi-transmitter neurons innervate Drosophila internal male reproductive organs
Source: eLife. 2026 Jan 9;14:RP108225. doi: 10.7554/eLife.108225 (PMC12788803; doi:10.7554/eLife.108225)
Supplement: Figure 10—figure supplement 2—source data 2. [file elife-108225-fig10-figsupp2-data2.xlsx]

## Sheet: Fertility Assay 30 Day
TRH ∩ VT019028 → vGlut -	TRH	VT019028	TRH ∩ VT019028
162	137	49	140
127	85	145	94
43	143	96	128
157	75	159	116
134	65	168	127
156	151	149	138
150	160	128	140
110	139	118	141
168	38	167	147
93	131		167
165	105		126
148	40		118
172	113		95
89			88
			139
			147
			103
			131
			65
