# Supplementary material for: Two classes of amine/glutamate multi-transmitter neurons innervate Drosophila internal male reproductive organs
Source: eLife. 2026 Jan 9;14:RP108225. doi: 10.7554/eLife.108225 (PMC12788803; doi:10.7554/eLife.108225)
Supplement: Figure 10—source data 1. [file elife-108225-fig10-data1.xlsx]

## Sheet: Mating Assay Duration
TRH ∩ AbdB > BONT-C	Tdc2 ∩ AbdB > BONT-C	AbdB ; BONT-C	BONT-C	AbdB ∩ VT019028 > BONT-C	WT Canton-S	TRH ∩ VT019028 > BONT-C
21.4833	19.8167	20.8833	21.8167	20.3833	29.5	26.2167
16.1167	19.8333	21.9	35.7	31.7833	26	29.7667
21.9333	28.65	31.3667	27.85	31.3167	21.5667	31.4667
25.4667	19.6833	24.0667	31.5333	26.9667	29.15	25.6
17.5667	20.5	34.7333	32.5333	26.5	24.45	29.65
18.3	21.2833	26.0167	24.6333	27.8833	29.05	28.6667
25.35	22.8667	31.0667	27.15	22.75	31.4833	28.5167
15.6167	26.2833	26.55		21.0833	28.6167	32.7833
13	25.55			23.45	22.3333	29
16.25	23.3			24.8333		27.3667
	19.5			18.4167		27.15
	19.5167			21.6333
	21.0667
	17.3667
